# Supplementary material for: Effects of SIPA1L1 on trabecular meshwork extracellular matrix protein accumulation and cellular phagocytosis in POAG
Source: JCI journal article supplement (doi:10.1172/jci.insight.174836), 2024-10-03

## Unedited blot and gel images

All unedited images of Western Blot were deposited as follows. The abbreviation of each lane was used to represent each group, in which the “C” means “Control”, “T” means “TGFβ2”, “T+si” means “TGFβ2+si-SIPA1L1”, “si” means “si-SIPA1L1” and “OE” means “Overexpressing SIPA1L1”.

### Full unedited blot/gel for Figure 2

#### SIPA1L1(Patient1)

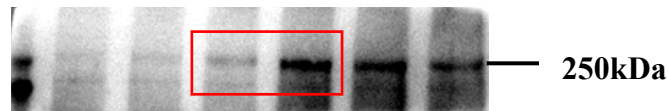

#### GAPDH

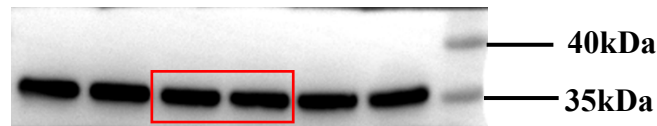

Non-POAG POAG

#### SIPA1L1(Patient2)

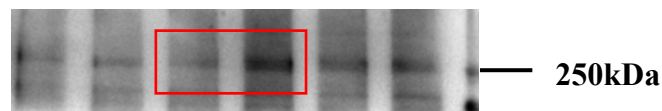

#### GAPDH

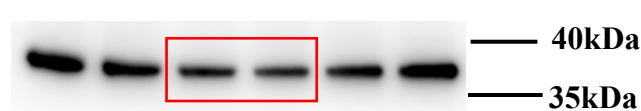

Non-POAG POAG

#### SIPA1L1(Patient3)

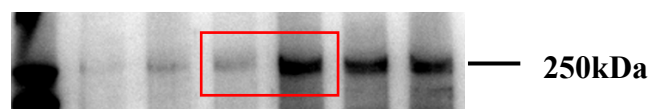

#### GAPDH

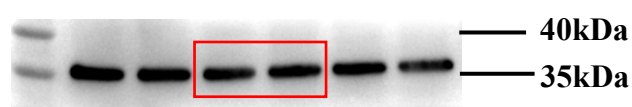

Non-POAG POAG

### Full unedited blot/gel for Figure 3

#### SIPA1L1

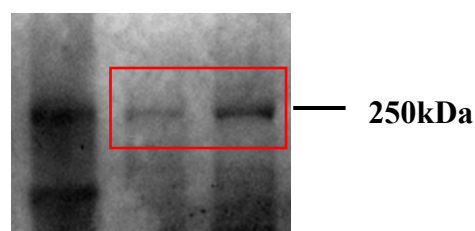

#### GAPDH

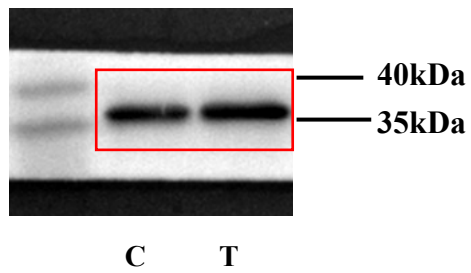

**Full unedited blot/gel for Figure 4**  
**SIPA1L1**

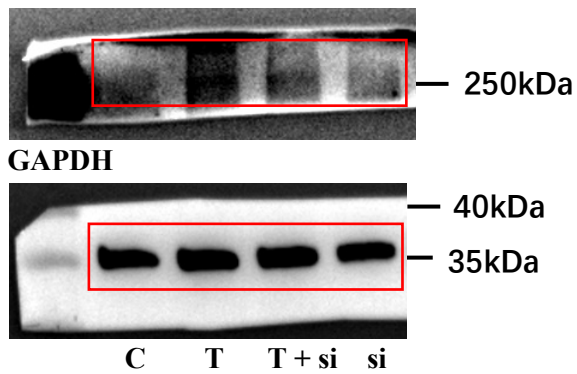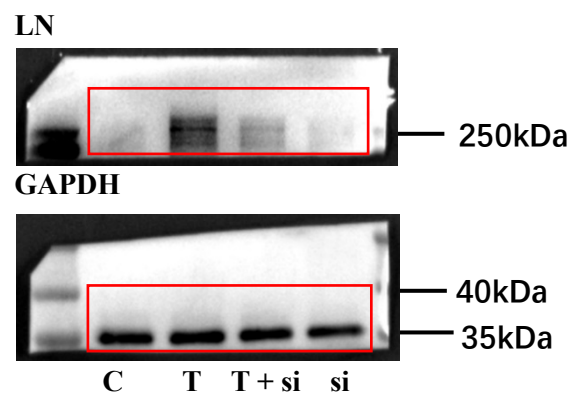

**Full unedited blot/gel for Figure 5**  
**RhoA**

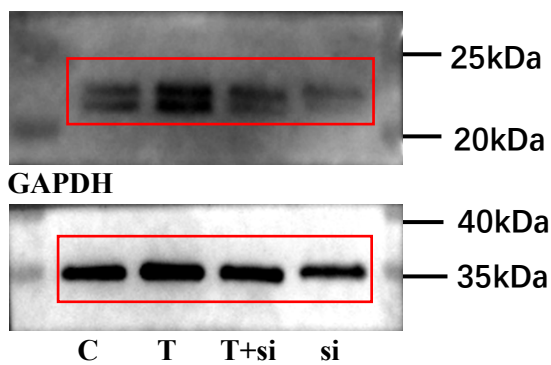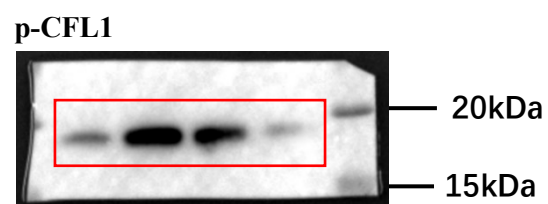

**FN**

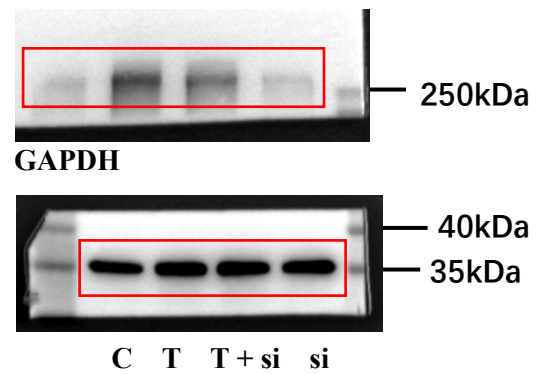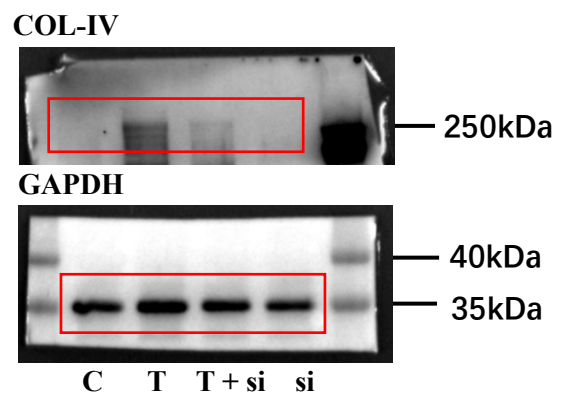

**CFL1**

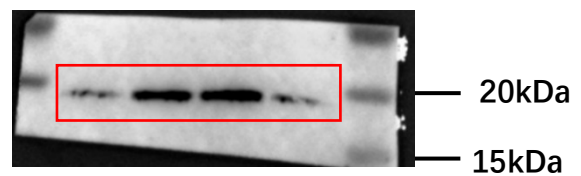

**GAPDH**

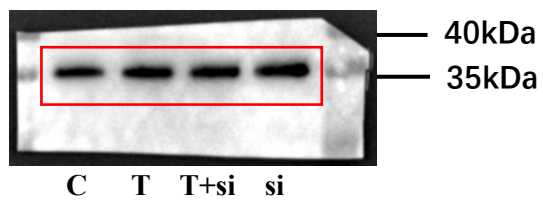

**GAPDH**

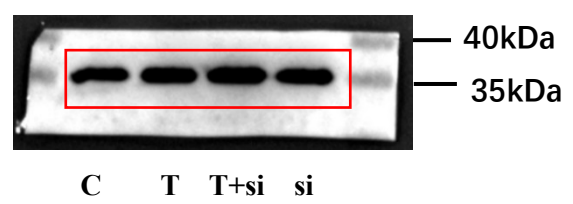

**Full unedited blot/gel for Figure 6**

**SIPA1L1**

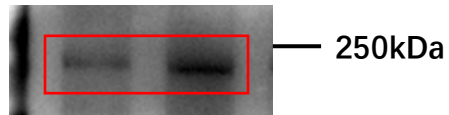

**GAPDH**

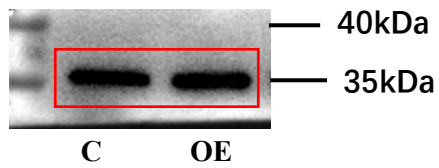

**LN**

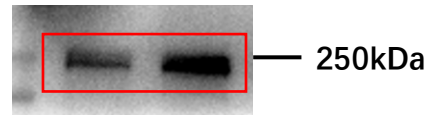

**GAPDH**

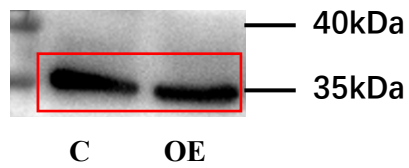

**FN**

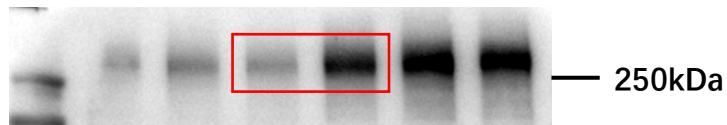

**GAPDH**

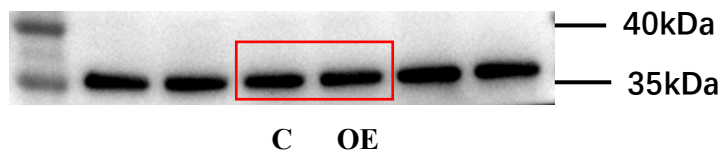

Supplement: sd2 [file 2]
